# Supplementary material for: Recent advances and strategies to tailor the energy levels, active sites and electron mobility in titania and its doped/composite analogues for hydrogen evolution in sunlight
Source: Royal Society of Chemistry journal article supplement (doi:10.1039/c8cy01395k), 2018-11-12
Supplement: c8cy01395k1.pdf [file c8cy01395k1.pdf]

## Supporting Information

### **Recent Advances and Strategies Applied to Tailor Energy levels, Active Sites and Electron Mobility in Titania and its Doped/Composite Analogues for Hydrogen Evolution in Sunlight**

Shwetharani R.,<sup>a</sup> M. Sakar,<sup>a</sup> CAN Fernando,<sup>b</sup> Vassilios D. Binas,<sup>c</sup> and R. Geetha Balakrishna,<sup>a\*</sup>

<sup>a</sup>Centre for Nano and Material Sciences, Jain University, Jain Global Campus, Bangalore - 562112, India

<sup>b</sup>Nano-Technology Research Lab, Department of Electronics, Wayamba University of Sri Lanka, Kuliypitiya, Sri Lanka

<sup>c</sup>Institute of Electronic Structure and Laser, FORTH, Greece

\*Email: [br.geetha@jainuniversity.ac.in](mailto:br.geetha@jainuniversity.ac.in)

**Table S1** Different methods of hydrogen generation.<sup>1</sup>

| <b>H<sub>2</sub> production process</b> | <b>Advantages</b>                                                         | <b>Drawback</b>                                                   |
|-----------------------------------------|---------------------------------------------------------------------------|-------------------------------------------------------------------|
| Steam reforming of methane              | Least expensive (48 % of world hydrogen produced by this route)           | Generation of greenhouse gases.                                   |
| Gasification of coal                    | Only competitive with methane reforming where natural gas is expensive.   | Generation of CO <sub>2</sub> ; Less efficient                    |
| Gasoline and methanol reforming         | Not mentioned. Requirement of pure oxygen;                                | Generation of more CO <sub>2</sub> than steam reforming.          |
| From biomass                            | Less expensive raw materials.                                             | Little contribution (4%) towards world H <sub>2</sub> production. |
| Electrolysis                            | Cost effective for production of extremely pure hydrogen in small amount. | Electrolysis is very much expensive at large scale.               |
| Solar and wind power based electrolysis | Less expensive than conventional electrolysis                             | Still in developing stage                                         |

**Table S2** Crystal phase/structure dependent H<sub>2</sub> evolution of TiO<sub>2</sub> photocatalyst

| Photocatalyst                                     | Crystal structure             | Band gap (eV) | Co-catalyst         | Light source                                             | Reactant solution | Sacrificial agents | H <sub>2</sub> evolution | Year | Ref |
|---------------------------------------------------|-------------------------------|---------------|---------------------|----------------------------------------------------------|-------------------|--------------------|--------------------------|------|-----|
| TiO <sub>2</sub>                                  | Anatase:<br>Rutile<br>(87:13) | 3.24          | No co-catalyst used | 415W Philips CLEO florescent tubes                       | Water             | Methanol           | 10.74 μmol/h             | 2013 | [2] |
| Cu-doped TiO <sub>2</sub> film                    | Anatase                       | Not mentioned | No co-catalyst used | 300-W Xe lamp                                            | Water             | Methanol           | 810 μmol/h/g             | 2014 | [3] |
| TiO <sub>2</sub> nanofiber                        | Anatase and Rutile            | 3.0           | Pt                  | 350 W Xe arc lamp                                        | Water             | Methanol           | 324 μmol/g/h             | 2014 | [4] |
| Pt/TiO <sub>2</sub>                               | Anatase/Rutile                | 3.1           | No co-catalyst used | 100 Watt ultraviolet lamp (H-144GC-100, Sylvania par 38) | Water             | Ethanol            | 2000 μmol/m <sup>2</sup> | 2015 | [5] |
| Ti <sup>3+</sup> -doped TiO <sub>2</sub> (Sheets) | Anatase                       | 3             | Pt                  | 300 W xenon lamp                                         | Water             | Methanol           | 46 μmol/g                | 2013 | [6] |
| Au/HTiNbO <sub>5</sub>                            | Orthorhombic                  | 2.1           | No co-catalyst used | 400 W halide lamp                                        | Water             | Methanol           | 100 μmol/h               | 2014 | [7] |

**Table S3** H<sub>2</sub> evolution efficiency of the porous structured TiO<sub>2</sub> composites

| Photocatalyst                                                                       | Porosity                | Crystal structure | Band gap (eV) | Co-catalyst         | Light source          | Reactant solution | Sacrificial agents                                                    | H <sub>2</sub> evolution | Year | Ref  |
|-------------------------------------------------------------------------------------|-------------------------|-------------------|---------------|---------------------|-----------------------|-------------------|-----------------------------------------------------------------------|--------------------------|------|------|
| N-doped mesoporous TiO <sub>2</sub>                                                 | <b>Mesoporous</b>       | Anatase           | 2.4           | No co-catalyst used | 450W Xe lamp          | Water             | Methanol                                                              | 14.9 μmol/g/h            | 2012 | [8]  |
| Hierarchical and fibrous meso-macroporous N-doped TiO <sub>2</sub>                  | <b>Meso-macroporous</b> | Anatase           | 2.3           | Pt                  | 125 W Hg visible lamp | Water             | Methanol                                                              | 380 μmol/g/h             | 2013 | [9]  |
| Mesoporous TiO <sub>2</sub> -SiO <sub>2</sub>                                       | <b>Mesoporous</b>       | Anatase           | 3.2           | No co-catalyst used | 300 W Xenon arc lamp  | Water             | Methanol                                                              | 0.08805 mmol/h           | 2014 | [10] |
| Three-dimensionally ordered macroporous N-doped TiO <sub>2</sub>                    | <b>Macroporous</b>      | Anatase           | ~2.4          | No co-catalyst used | 300 W xenon lamp      | Water             | 0.25 M Na <sub>2</sub> S and 0.35 M Na <sub>2</sub> SO <sub>3</sub> , | 29 μmol/g/h              | 2014 | [11] |
| g-C <sub>3</sub> N <sub>4</sub> nanosheets hybridized N-TiO <sub>2</sub> nanofibers | <b>Mesoporous</b>       | Anatase           | 2.8           | Pt                  | 300 W xenon arc lamp  | Water             | Methanol                                                              | 8931 μmol/g/h            | 2014 | [12] |

**Table S4** Particle shape/morphology dependent H<sub>2</sub> evolution efficiency of TiO<sub>2</sub> photocatalyst.

| <b>Photocatalyst</b>                        | <b>Morphology</b>              | <b>Crystal structure</b> | <b>Band gap (eV)</b> | <b>Co-catalyst</b>  | <b>Light source</b>         | <b>Reactant solution</b> | <b>Sacrificial agents</b>                         | <b>H<sub>2</sub> evolution</b> | <b>Year</b> | <b>Ref</b> |
|---------------------------------------------|--------------------------------|--------------------------|----------------------|---------------------|-----------------------------|--------------------------|---------------------------------------------------|--------------------------------|-------------|------------|
| Pt@CuO/TiO <sub>2</sub>                     | <b>Nanorods and Nanosheets</b> | Anatase                  | 2.9                  | Pt                  | 500 W high-pressure Xe lamp | Water                    | Methanol                                          | 200 μL/h                       | 2014        | [13]       |
| Pt-TiO <sub>2</sub> nanotube arrays         | <b>Nanotube arrays</b>         | Not mentioned            | 3.2                  | No co-catalyst used | 300 W Xe lamp               | Water                    | Na <sub>2</sub> SO <sub>4</sub> & ethylene Glycol | 135 μmol/h                     | 2014        | [14]       |
| Titanium phosphate                          | <b>Layered hexagonal shape</b> | Anatase                  | 3.2                  | No co-catalyst used | 300 W Xenon lamp            | Water                    | Methanol                                          | 286 μmol/h                     | 2014        | [15]       |
| Hierarchical nanstructured TiO <sub>2</sub> | <b>3D urchin</b>               | Anatase                  | 3.17                 | Pt                  | 300 W Xe lamp               | Water                    | Methanol                                          | 1310 μmol/h/g                  | 2014        | [16]       |

**Table S5** H<sub>2</sub> evolution efficiency of the doped-TiO<sub>2</sub> photocatalyst

| Photocatalyst                                       | Dopant                        | Crystal structure  | Band gap (eV) | Co-catalyst | Light source                                                      | Reactant solution | Sacrificial agents                                                     | H <sub>2</sub> evolution                            | Year | Ref  |
|-----------------------------------------------------|-------------------------------|--------------------|---------------|-------------|-------------------------------------------------------------------|-------------------|------------------------------------------------------------------------|-----------------------------------------------------|------|------|
| Nitrogen doped TiO <sub>2</sub>                     | N                             | Anatase            | 3.08          | -           | 400 W medium pressure halide lamp UV / 500 W halogen Lamp-Visible | Water             | Methanol                                                               | 4386 $\mu\text{mol/g/h}$<br>185 $\mu\text{mol/g/h}$ | 2012 | [17] |
| C,N-TiO <sub>2</sub>                                | C, N                          | Anatase            | 2.92          | -           | Xe-lamp                                                           | Water             | Methanol                                                               | 81.8 $\mu\text{mol/h}$                              | 2013 | [18] |
| Carbon coated N-TiO <sub>2</sub> nanotube films     | C, N                          | Rutile and Anatase | 2             | -           | 500 W high-pressure ball-shaped Xe lamp                           | Water             | Na <sub>2</sub> S (0.1 M) and Na <sub>2</sub> SO <sub>3</sub> (0.02 M) | 400 $\mu\text{mol/g/h}$                             | 2012 | [19] |
| TiO <sub>2</sub> functionalized N- graphene (NGR)   | N and graphene                | Anatase            | -             | -           | 150 W GY-10 xenon lamp                                            | Water             | triethanol amine                                                       | 13.3 $\mu\text{mol/h}$                              | 2014 | [20] |
| N-TiO <sub>2</sub> /graphene oxide                  | N and graphene                | Anatase            | 2.69          | -           | 500W high-pressure Hg lamp                                        | Water             | Methanol                                                               | 250 $\mu\text{mol/h}$                               | 2012 | [21] |
| Self doped TiO <sub>2</sub> -graphene nanoplatelets | Ti <sup>3+</sup> and graphene | Anatase            | -             | Pd          | day-light fluorescent lamps                                       | Water             | Methanol                                                               | 288 $\mu\text{mol/h}$                               | 2014 | [22] |
| N-TiO <sub>2</sub>                                  | N                             | Anatase            | 2.9           | Pd          | day-light fluorescent lamps (Wipro, 36 W each)                    | Water             | Methanol                                                               | 12 $\mu\text{mol}/2\text{ h}/50\text{ mg}$          | 2012 | [23] |
| N-TiO <sub>2</sub>                                  | N                             | Anatase            | 2.4           | Pt          | Xe lamp (300 W)                                                   | Water             | Na <sub>2</sub> SO <sub>3</sub>                                        | 310 $\mu\text{mol/h}$                               | 2006 | [24] |

|                                                     |       |         |      |    |                                                   |                 |          |               |      |      |
|-----------------------------------------------------|-------|---------|------|----|---------------------------------------------------|-----------------|----------|---------------|------|------|
| S- and C-codoped TiO <sub>2</sub>                   | S, C  | Anatase | 3.1  | Pt | 400 W high pressure Hg lamp                       | Water           | Methanol | 70000 μmol/h  | 2013 | [25] |
| TiO <sub>2</sub> was co-doped with P and N          | P,N   | Rutile  | 2.0  | -  | 300-W Xe lamp                                     | Water           | -        | 11.2 μmol/g/h | 2014 | [26] |
| Pt-N La <sub>2</sub> Ti <sub>2</sub> O <sub>7</sub> | Pt, N | -       | 1.56 | -  | Luzchem LZC-UVA, centered at 360 nm               | Deionized water | -        | 200 μmol/h    | 2013 | [27] |
| Indium and nitrogen co-doped TiO <sub>2</sub>       | In, N | Anatase | 3.0  | -  | Ordinary day light fluorescent lamps (Wipro, 36W) | Water           | Methanol | 13.9 μmol/h   | 2010 | [28] |
| Ga-N co-doped TiO <sub>2</sub>                      | Ga, N | Anatase | 3    | -  | 125 W mercury lamp with a 400 nm cut-off filter   | Water           | Methanol | 5 μmol/g/h    | 2012 | [29] |
| Ce/N-Codoped TiO <sub>2</sub>                       | Ce, N | Anatase | 2.52 | -  | 500W medium pressure mercury lamp                 | Water           | Methanol | 100 μmol/h    | 2010 | [30] |

**Table S6** H<sub>2</sub> evolution of the TiO<sub>2</sub> composite photocatalyst

| Photocatalyst                                                                                                        | Composite material                                | Crystal structure                                                           | Band gap (eV)                    | Co-catalyst | Light source                                                          | Reactant solution | Sacrificial agents | H <sub>2</sub> evolution         | Ref  |
|----------------------------------------------------------------------------------------------------------------------|---------------------------------------------------|-----------------------------------------------------------------------------|----------------------------------|-------------|-----------------------------------------------------------------------|-------------------|--------------------|----------------------------------|------|
| Eosin -sensitized CuO incorporated TiO <sub>2</sub>                                                                  | Eosin dye and CuO                                 | -                                                                           | -                                | -           | 200 W halogen lamp                                                    | Water             | diethanolamine     | 10.56 μmol/h                     | [31] |
| CuO/TiO <sub>2</sub>                                                                                                 | CuO                                               | Anatase: Rutile                                                             | 2.61                             | -           | SB-100P/F lamp (100 W, 365 nm)                                        | Water             | Ethanol            | 21300 μmol/h                     | [32] |
| Cu(OH) <sub>2</sub> /TiO <sub>2</sub> nanotube arrays                                                                | Cu(OH) <sub>2</sub>                               | Anatase                                                                     | 3.2                              | -           | PLS-SXE300UV Xe lamp                                                  | Water             | ethylene glycol    | 6.5 μmol/h/cm <sup>2</sup>       | [33] |
| TiO <sub>2</sub> /CuO composite nanofibers                                                                           | CuO                                               | Anatase                                                                     | 2.6                              | -           | 400 W Hg lamp and 360 W Na lamp as the UV-vis light source            | Water             | Methanol           | 5500 μmol/h                      | [34] |
| ZnO/TiO <sub>2</sub> composite                                                                                       | ZnO                                               | Anatase/Crystalline /Amorphous                                              | -                                | -           | 300 W xenon lamp                                                      | Water             | Methanol           | 865 μmol/h                       | [35] |
| Ta <sub>2</sub> O <sub>5</sub> -TiO <sub>2</sub> / S doped TiO <sub>2</sub> / S doped Ta <sub>2</sub> O <sub>5</sub> | Ta <sub>2</sub> O <sub>5</sub> , S                | Anatase                                                                     | 3.09 / 2.9 / 2.9                 | Pt          | visible and UV irradiation (>300 nm) applying four 300W Vitalux bulbs | Water             | Methanol           | 0.14 mmol / 4.55 mmol / 0.24mmol | [36] |
| Core-shell CuS@TiO <sub>2</sub>                                                                                      | CuS                                               | Anatase                                                                     | CuS 1.35 / TiO <sub>2</sub> 3.19 | -           | UV-lamps (18Wcm <sup>-2</sup> )                                       | Water             | Methanol           | 1.2 mmol/h                       | [37] |
| Copper oxide incorporated indium Titanium oxide                                                                      | Cu <sub>2</sub> O, In <sub>2</sub> O <sub>3</sub> | cubic In <sub>2</sub> O <sub>3</sub> and Anatase TiO <sub>2</sub> structure | 2.01                             | -           | 500 W tungsten halogen lamp                                           | Water             | Methanol           | 2149 μmol/g/h                    | [38] |

|                                                                                      |                                |                 |          |    |                                                                    |       |                                                       |                |      |
|--------------------------------------------------------------------------------------|--------------------------------|-----------------|----------|----|--------------------------------------------------------------------|-------|-------------------------------------------------------|----------------|------|
| Pt-Sr(Zr <sub>1-x</sub> Y <sub>x</sub> )O <sub>3-δ</sub> -TiO <sub>2</sub> (Pt-SZYT) | Pt, Sr, Zr, Y                  | Anatase, Rutile | -        | -  | 250 W xenon lamp                                                   | Water | oxalic acid                                           | 1.68 mmol/h    | [39] |
| Ni/NiO/N-TiO <sub>2-x</sub>                                                          | Ni, NiO, N                     | Anatase         | ~3.0-2.4 | -  | 110-W high-pressure sodium lamp with UV cutoff filter (λ > 420 nm) | Water | Methanol                                              | 1210 μmol/g/h  | [40] |
| Ti <sup>3+</sup> -doped TiO <sub>2</sub> (Sheets)                                    | Ti <sup>3+</sup>               | Anatase         | 3        | Pt | 300 W xenon lamp                                                   | Water | Methanol                                              | 46 μmol/g      | [41] |
| CdS decorated Au@TiO <sub>2</sub> core-shell                                         | CdS, Au                        | Anatase         | -        | -  | 300-W Xenon lamp                                                   | Water | Na <sub>2</sub> S and Na <sub>2</sub> SO <sub>3</sub> | 3.94 μmol/h    | [42] |
| CdS/TiO <sub>2</sub>                                                                 | CdS                            | Anatase         | 2.2      | -  | Hg-Arc lamp (500 W)                                                | Water | Na <sub>2</sub> S and Na <sub>2</sub> SO <sub>3</sub> | 422.4 μmol/h   | [43] |
| CdS-trititanate nanotube                                                             | CdS                            | Hexagonal       | 2.4      | -  | 300 W Xenon lamp                                                   | Water | Ethanol                                               | 10 μmol/h      | [44] |
| TiO <sub>2</sub> /Fe <sub>2</sub> O <sub>3</sub>                                     | Fe <sub>2</sub> O <sub>3</sub> | -               | -        | Pt | 300 W xenon lamp                                                   | Water | Methanol                                              | 1.5 mmol/h     | [45] |
| Nanocomposite of MWCNTs and TiO <sub>2</sub> nanoparticles                           | MWCNTs                         | -               | ~ 3      | -  | 500 W Hg-lamp                                                      | Water | triethanolamine                                       | 8 mmol/g/h     | [46] |
| Carbon/TiO <sub>2</sub> /carbon nanotubes                                            | Carbon                         | Anatase         | ~ 0.88   | -  | Solar simulator (Newport, 94023 A)                                 | Water | Ethanol                                               | 37.6 mmol/h/g  | [47] |
| TiO <sub>2</sub> -RGO                                                                | RGO                            | Anatase         | 2.9      | -  | 300 W xenon/mercury lamp                                           | Water | Ethanol                                               | 1.125 mmol/g/h | [48] |



|                                                                         |                      |                 |       |   |                   |       |                                                                     |                   |      |
|-------------------------------------------------------------------------|----------------------|-----------------|-------|---|-------------------|-------|---------------------------------------------------------------------|-------------------|------|
| CuO/TiO <sub>2</sub> -GR                                                | CuO, GR              | Anatase: Rutile | 2.8   | - | 500 W Xe arc lamp | Water | Methanol                                                            | 2905.60<br>μmol/h | [49] |
| Pt/TiO <sub>2</sub> /activated carbon                                   | Pt, activated carbon | Anatase         | 3.1   | - | 250 W Hg lamp     | Water | Methanol                                                            | 650<br>μmol/h     | [50] |
| Three-dimensionally ordered macroporous (3DOM) N-doped TiO <sub>2</sub> | N                    | Anatase         | ~ 2.4 | - | 300 W xenon lamp  | Water | 0.25 M Na <sub>2</sub> S and 0.35 M Na <sub>2</sub> SO <sub>3</sub> | 29<br>μmol/g/h    | [51] |
| CuO/Carbon Fiber/TiO <sub>2</sub>                                       | CuO, Carbon Fiber    | 80:20 A:R       | 2.85  | - | Xenon lamp        | Water | Ethanol                                                             | 2000<br>μmol/h    | [52] |

**Table S7** Noble metal supported TiO<sub>2</sub> photocatalyst and their hydrogen evolution

| Photocatalyst       | Crystal structure  | Band gap (eV) | Co-catalyst | Light source                          | Reactant solution | Sacrificial agents | H <sub>2</sub> evolution | Year | Ref  |
|---------------------|--------------------|---------------|-------------|---------------------------------------|-------------------|--------------------|--------------------------|------|------|
| Au/TiO <sub>2</sub> | -                  | 3.2           | -           | UV-PC mercury lamp                    | <b>Water</b>      | Methanol           | 1866 μmol/h              | 2013 | [53] |
| Au/TiO <sub>2</sub> | Anatase            | 2.29          | -           | Solar simulator (Thermo Oriel 1000 W) | <b>Water</b>      | Methanol           | 45 μmol/h                | 2013 | [54] |
| Pt/TiO <sub>2</sub> | Anatase and Rutile | 3.19          | -           | 150 W mercury lamp                    | <b>Water</b>      | Methanol           | 220 μmol/h               | 2014 | [55] |
| Pt/TiO <sub>2</sub> | Anatase/Rutile     | 3.1           | -           | 350 W high-pressure mercury lamp      | <b>Water</b>      | Methanol           | 2100 μmol/h              | 2012 | [56] |
| Pt/TiO <sub>2</sub> | Anatase            | -             | -           | 300W Xe lamp                          | <b>Water</b>      | Methanol           | 739.94 μmol/h            | 2010 | [57] |
| Pt/TiO <sub>2</sub> | Rutile             | 3.0           | -           | 300 W xenon lamp                      | <b>Water</b>      | -                  | 33 μmol/h                | 2014 | [58] |

## References

- [1] M. Momirlan, T. N. V. Current status of hydrogen energy. *Renewable and Sustainable Energy Reviews* **2002**, *6*, 141–179.
- [2] Pulido Melián, E.; González Díaz, O.; Ortega Méndez, A.; López, C. R.; Nereida Suárez, M.; Doña Rodríguez, J. M.; Navío, J. A.; Fernández Hevia, D.; Pérez Peña, J. Efficient and affordable hydrogen production by water photo-splitting using TiO<sub>2</sub>-based photocatalysts. *International Journal of Hydrogen Energy* **2013**, *38*, 2144-2155.
- [3] Wang, C.; Hu, Q.; Huang, J.; Zhu, C.; Deng, Z.; Shi, H.; Wu, L.; Liu, Z.; Cao, Y. Enhanced hydrogen production by water splitting using Cu-doped TiO<sub>2</sub> film with preferred (001) orientation. *Applied Surface Science* **2014**, *292*, 161-164.
- [4] Xu, F.; Xiao, W.; Cheng, B.; Yu, J. Direct Z-scheme anatase/rutile bi-phase nanocomposite TiO<sub>2</sub> nanofiber photocatalyst with enhanced photocatalytic H<sub>2</sub>-production activity. *International Journal of Hydrogen Energy* **2014**, *39*, 15394-15402.
- [5] Bashir, S.; Wahab, A. K.; Idriss, H. Synergism and photocatalytic water splitting to hydrogen over M/TiO<sub>2</sub> catalysts: Effect of initial particle size of TiO<sub>2</sub>. *Catalysis Today* **2015**, *240*, 242-247.
- [6] Li, Y.; Yu, Z.; Meng, J.; Li, Y. Enhancing the activity of a SiC-TiO<sub>2</sub> composite catalyst for photo-stimulated catalytic water splitting. *International Journal of Hydrogen Energy* **2013**, *38*, 3898-3904.
- [7] Lin, H.-Y.; Chang, Y.-S. Photocatalytic water splitting on Au/HTiNbO<sub>5</sub> nanosheets. *International Journal of Hydrogen Energy* **2014**, *39*, 3118-3126.
- [8] Liu, S.-H.; Syu, H.-R. One-step fabrication of N-doped mesoporous TiO<sub>2</sub> nanoparticles by self-assembly for photocatalytic water splitting under visible light. *Applied Energy* **2012**, *100*, 148-154.
- [9] Parida, K. M.; Pany, S.; Naik, B. Green synthesis of fibrous hierarchical meso-macroporous N doped TiO<sub>2</sub> nanophotocatalyst with enhanced photocatalytic H<sub>2</sub> production. *International Journal of Hydrogen Energy* **2013**, *38*, 3545-3553.
- [10] Niphadkar, P. S.; Chitale, S. K.; Sonar, S. K.; Deshpande, S. S.; Joshi, P. N.; Awate, S. V. Synthesis, characterization and photocatalytic behavior of TiO<sub>2</sub>-SiO<sub>2</sub> mesoporous

- composites in hydrogen generation from water splitting. *Journal of Materials Science* **2014**, *49*, 6383-6391.
- [11] Wang, T.; Yan, X.; Zhao, S.; Lin, B.; Xue, C.; Yang, G.; Ding, S.; Yang, B.; Ma, C.; Yang, G.; Yang, G. A facile one-step synthesis of three-dimensionally ordered macroporous N-doped TiO<sub>2</sub> with ethanediamine as the nitrogen source. *Journal of Materials Chemistry A* **2014**, *2*, 15611-15619.
- [12] Han, C.; Wang, Y.; Lei, Y.; Wang, B.; Wu, N.; Shi, Q.; Li, Q. In situ synthesis of graphitic-C<sub>3</sub>N<sub>4</sub> nanosheet hybridized N-doped TiO<sub>2</sub> nanofibers for efficient photocatalytic H<sub>2</sub> production and degradation. *Nano Research* **2015**, *8*, 1199-1209.
- [13] Teng, F.; Chen, M.; Li, N.; Hua, X.; Wang, K.; Xu, T. Effect of TiO<sub>2</sub> Surface Structure on the Hydrogen Production Activity of the Pt@CuO/TiO<sub>2</sub> Photocatalysts for Water Splitting. *ChemCatChem* **2014**, *6*, 842-847.
- [14] Zhang, L.; Pan, N.; Lin, S. Influence of Pt deposition on water-splitting hydrogen generation by highly-ordered TiO<sub>2</sub> nanotube arrays. *International Journal of Hydrogen Energy* **2014**, *39*, 13474-13480.
- [15] Guo, S.-y.; Han, S.; Chi, B.; Pu, J.; Li, J. Synthesis of shape-controlled mesoporous titanium phosphate nanocrystals: The hexagonal titanium phosphate with enhanced hydrogen generation from water splitting. *International Journal of Hydrogen Energy* **2014**, *39*, 2446-2453.
- [16] Haider, Z.; Kang, Y. S. Facile Preparation of Hierarchical TiO<sub>2</sub> Nano Structures: Growth Mechanism and Enhanced Photocatalytic H<sub>2</sub> Production from Water Splitting Using Methanol as a Sacrificial Reagent. *ACS Applied Materials & Interfaces* **2014**, *6*, 10342-10352.
- [17] Lin, H.-y.; Shih, C.-y. Efficient One-Pot Microwave-Assisted Hydrothermal Synthesis of Nitrogen-Doped TiO<sub>2</sub> for Hydrogen Production by Photocatalytic Water Splitting. *Catalysis Surveys from Asia* **2012**, *16*, 231-239.
- [18] Liu, S.-H.; Syu, H.-R. High visible-light photocatalytic hydrogen evolution of C,N-codoped mesoporous TiO<sub>2</sub> nanoparticles prepared via an ionic-liquid-template approach. *International Journal of Hydrogen Energy* **2013**, *38*, 13856-13865.

- [19] Jia, F. Z.; Yao, Z. P.; Jiang, Z. H. Carbon Coated N-Doping of TiO<sub>2</sub> Nanotube Films with Enhanced Visible-Light Photocatalytic Activity. *Advanced Materials Research* **2012**, 512-515, 1564-1567.
- [20] Mou, Z.; Wu, Y.; Sun, J.; Yang, P.; Du, Y.; Lu, C. TiO<sub>2</sub> Nanoparticles-Functionalized N-Doped Graphene with Superior Interfacial Contact and Enhanced Charge Separation for Photocatalytic Hydrogen Generation. *ACS Applied Materials & Interfaces* **2014**, 6, 13798-13806.
- [21] Pei, F.; Liu, Y.; Xu, S.; Lü, J.; Wang, C.; Cao, S. Nanocomposite of graphene oxide with nitrogen-doped TiO<sub>2</sub> exhibiting enhanced photocatalytic efficiency for hydrogen evolution. *International Journal of Hydrogen Energy* **2013**, 38, 2670-2677.
- [22] Sayed, F. N.; Sasikala, R.; Jayakumar, O. D.; Rao, R.; Betty, C. A.; Chokkalingam, A.; Kadam, R. M.; Jagannath; Bharadwaj, S. R.; Vinu, A.; Tyagi, A. K. Photocatalytic hydrogen generation from water using a hybrid of graphene nanoplatelets and self doped TiO<sub>2</sub>-Pd. *RSC Advances* **2014**, 4, 13469-13476.
- [23] Sayed, F. N.; Jayakumar, O. D.; Sasikala, R.; Kadam, R. M.; Bharadwaj, S. R.; Kienle, L.; Schürmann, U.; Kaps, S.; Adlung, R.; Mittal, J. P.; Tyagi, A. K. Photochemical Hydrogen Generation Using Nitrogen-Doped TiO<sub>2</sub>-Pd Nanoparticles: Facile Synthesis and Effect of Ti<sup>3+</sup> Incorporation. *The Journal of Physical Chemistry C* **2012**, 116, 12462-12467.
- [24] J. Yuan, M. C., J. Shi, and W. Shangguan, . Preparations and photocatalytic hydrogen evolution of N-doped TiO<sub>2</sub> from urea and titanium tetrachloride. *International Journal of Hydrogen Energy*, **2006**, 31, 1326–1331.
- [25] Bai, H.; Kwan, K. S. Y.; Liu, Z.; Song, X.; Lee, S. S.; Sun, D. D. Facile synthesis of hierarchically meso/nanoporous S- and C-codoped TiO<sub>2</sub> and its high photocatalytic efficiency in H<sub>2</sub> generation. *Applied Catalysis B: Environmental* **2013**, 129, 294-300.
- [26] Zheng, P.; Wu, H.; Guo, J.; Dong, J.; Jia, S.; Zhu, Z. P–N co-doping induced structural recovery of TiO<sub>2</sub> for overall water splitting under visible light irradiation. *Journal of Alloys and Compounds* **2014**, 615, 79-83.

- [27] Meng, F.; Li, J.; Hong, Z.; Zhi, M.; Sakla, A.; Xiang, C.; Wu, N. Photocatalytic generation of hydrogen with visible-light nitrogen-doped lanthanum titanium oxides. *Catalysis Today* **2013**, *199*, 48-52.
- [28] Sasikala, R.; Shirole, A. R.; Sudarsan, V.; Jagannath; Sudakar, C.; Naik, R.; Rao, R.; Bharadwaj, S. R. Enhanced photocatalytic activity of indium and nitrogen co-doped TiO<sub>2</sub>-Pd nanocomposites for hydrogen generation. *Applied Catalysis A: General* **2010**, *377*, 47-54.
- [29] XiaoBo Li, Q. L., XiaoYing Jiang, Jianhua Huang. Enhanced Photocatalytic Activity of Ga-N Co-doped Anatase TiO<sub>2</sub> for Water Decomposition to Hydrogen. *International Journal of Electrochemical Science* **2012**, *7*, 11519 - 11527.
- [30] Sun, X.; Liu, H.; Dong, J.; Wei, J.; Zhang, Y. Preparation and Characterization of Ce/N-Codoped TiO<sub>2</sub> Particles for Production of H<sub>2</sub> by Photocatalytic Splitting Water Under Visible Light. *Catalysis Letters* **2010**, *135*, 219-225.
- [31] Jin, Z.; Zhang, X.; Li, Y.; Li, S.; Lu, G. 5.1% Apparent quantum efficiency for stable hydrogen generation over eosin-sensitized CuO/TiO<sub>2</sub> photocatalyst under visible light irradiation. *Catalysis Communications* **2007**, *8*, 1267-1273.
- [32] Chen, W.-T.; Jovic, V.; Sun-Waterhouse, D.; Idriss, H.; Waterhouse, G. I. N. The role of CuO in promoting photocatalytic hydrogen production over TiO<sub>2</sub>. *International Journal of Hydrogen Energy* **2013**, *38*, 15036-15048.
- [33] Zhang, S.; Wang, H.; Yeung, M.; Fang, Y.; Yu, H.; Peng, F. Cu(OH)<sub>2</sub>-modified TiO<sub>2</sub> nanotube arrays for efficient photocatalytic hydrogen production. *International Journal of Hydrogen Energy* **2013**, *38*, 7241-7245.
- [34] Lee, S. S.; Bai, H.; Liu, Z.; Sun, D. D. Optimization and an insightful properties-Activity study of electrospun TiO<sub>2</sub>/CuO composite nanofibers for efficient photocatalytic H<sub>2</sub> generation. *Applied Catalysis B: Environmental* **2013**, *140-141*, 68-81.
- [35] Guo, S.; Han, S.; Mao, H.; Dong, S.; Wu, C.; Jia, L.; Chi, B.; Pu, J.; Li, J. Structurally controlled ZnO/TiO<sub>2</sub> heterostructures as efficient photocatalysts for hydrogen generation from water without noble metals: The role of microporous

- amorphous/crystalline composite structure. *Journal of Power Sources* **2014**, *245*, 979-985.
- [36] Stodolny, M.; Laniecki, M. Synthesis and characterization of mesoporous Ta<sub>2</sub>O<sub>5</sub>-TiO<sub>2</sub> photocatalysts for water splitting. *Catalysis Today* **2009**, *142*, 314-319.
- [37] Im, Y.; Kang, S.; Kim, K. M.; Ju, T.; Han, G. B.; Park, N.-K.; Lee, T. J.; Kang, M. Dynamic Hydrogen Production from Methanol/Water Photo-Splitting Using Core@Shell-Structured CuS@TiO<sub>2</sub> Catalyst Wrapped by High Concentrated TiO<sub>2</sub> Particles. *International Journal of Photoenergy* **2013**, *2013*, 1-10.
- [38] Vinothkumar, N.; De, M. Hydrogen production from water-methanol solution over visible light active indium-titanium oxide photocatalysts modified with copper oxide. *International Journal of Hydrogen Energy* **2014**, *39*, 11494-11500.
- [39] Yan, J.; Liu, Q.; Guan, L.; Liang, F.; Gu, H. Photocatalytic hydrogen generation of Pt-Sr(Zr<sub>1-x</sub>Y<sub>x</sub>)O<sub>3-δ</sub>-TiO<sub>2</sub> heterojunction under the irradiation of simulated sunlight. *Frontiers of Chemistry in China* **2009**, *4*, 121-126.
- [40] Hu, S.; Li, F.; Fan, Z.; Gui, J. Improved photocatalytic hydrogen production property over Ni/NiO/N-TiO<sub>2-x</sub> heterojunction nanocomposite prepared by NH<sub>3</sub> plasma treatment. *Journal of Power Sources* **2014**, *250*, 30-39.
- [41] Wang, J.; Zhang, P.; Li, X.; Zhu, J.; Li, H. Synchronical pollutant degradation and H<sub>2</sub> production on a Ti<sup>3+</sup>-doped TiO<sub>2</sub> visible photocatalyst with dominant (001) facets. *Applied Catalysis B: Environmental* **2013**, *134-135*, 198-204.
- [42] Fang, J.; Xu, L.; Zhang, Z.; Yuan, Y.; Cao, S.; Wang, Z.; Yin, L.; Liao, Y.; Xue, C. Au@TiO<sub>2</sub>-CdS Ternary Nanostructures for Efficient Visible-Light-Driven Hydrogen Generation. *ACS Applied Materials & Interfaces* **2013**, *5*, 8088-8092.
- [43] Jang, J. S.; Li, W.; Oh, S. H.; Lee, J. S. Fabrication of CdS/TiO<sub>2</sub> nano-bulk composite photocatalysts for hydrogen production from aqueous H<sub>2</sub>S solution under visible light. *Chemical Physics Letters* **2006**, *425*, 278-282.
- [44] Parayil, S. K.; Baltrusaitis, J.; Wu, C.-M.; Koodali, R. T. Synthesis and characterization of ligand stabilized CdS-Trititanate composite materials for visible light-induced

- photocatalytic water splitting. *International Journal of Hydrogen Energy* **2013**, *38*, 2656-2669.
- [45] Luan, P.; Xie, M.; Fu, X.; Qu, Y.; Sun, X.; Jing, L. Improved photoactivity of TiO<sub>2</sub>-Fe<sub>2</sub>O<sub>3</sub> nanocomposites for visible-light water splitting after phosphate bridging and its mechanism. *Physical Chemistry Chemical Physics* **2015**, *17*, 5043-5050.
- [46] Ke, D.; Tianyou, P.; Dingning, K.; Bingqing, W. Photocatalytic hydrogen generation using a nanocomposite of multi-walled carbon nanotubes and TiO<sub>2</sub> nanoparticles under visible light irradiation. *Nanotechnology* **2009**, *20*, 125603.
- [47] Zhao, C.; Luo, H.; Chen, F.; Zhang, P.; Yi, L.; You, K. A novel composite of TiO<sub>2</sub> nanotubes with remarkably high efficiency for hydrogen production in solar-driven water splitting. *Energy & Environmental Science* **2014**, *7*, 1700-1707.
- [48] Nagaraju, G.; Manjunath, K.; Sarkar, S.; Gunter, E.; Teixeira, S. R.; Dupont, J. TiO<sub>2</sub>-RGO hybrid nanomaterials for enhanced water splitting reaction. *International Journal of Hydrogen Energy* **2015**, *40*, 12209-12216.
- [49] Wang, B.; Sun, Q.; Liu, S.; Li, Y. Synergetic catalysis of CuO and graphene additives on TiO<sub>2</sub> for photocatalytic water splitting. *International Journal of Hydrogen Energy* **2013**, *38*, 7232-7240.
- [50] Hakamizadeh, M.; Afshar, S.; Tadjarodi, A.; Khajavian, R.; Fadaie, M. R.; Bozorgi, B. Improving hydrogen production via water splitting over Pt/TiO<sub>2</sub>/activated carbon nanocomposite. *International Journal of Hydrogen Energy* **2014**, *39*, 7262-7269.
- [51] Zang, Y.; Li, L.; Xu, Y.; Zuo, Y.; Li, G. Hybridization of brookite TiO<sub>2</sub> with g-C<sub>3</sub>N<sub>4</sub>: A visible-light-driven photocatalyst for As<sup>3+</sup> oxidation, MO degradation and water splitting for hydrogen evolution. *Journal of Materials Chemistry A* **2014**, *2*, 15774-15780.
- [52] Yu, Z.; Meng, J.; Li, Y.; Li, Y. Efficient photocatalytic hydrogen production from water over a CuO and carbon fiber comodified TiO<sub>2</sub> nanocomposite photocatalyst. *International Journal of Hydrogen Energy* **2013**, *38*, 16649-16655.
- [53] Oros-Ruiz, S.; Zanella, R.; Lopez, R.; Hernandez-Gordillo, A.; Gomez, R. Photocatalytic hydrogen production by water/methanol decomposition using Au/TiO<sub>2</sub>



- prepared by deposition-precipitation with urea. *Journal of hazardous materials* **2013**, *263 Pt 1*, 2-10.
- [54] Buaki-Sogo, M.; Serra, M.; Primo, A.; Alvaro, M.; Garcia, H. Alginate as Template in the Preparation of Active Titania Photocatalysts. *ChemCatChem* **2013**, *5*, 513-518.
- [55] Serrano, D. P.; Calleja, G.; Pizarro, P.; Gálvez, P. Enhanced photocatalytic hydrogen production by improving the Pt dispersion over mesostructured TiO<sub>2</sub>. *International Journal of Hydrogen Energy* **2014**, *39*, 4812-4819.
- [56] Wei, P.; Liu, J.; Li, Z. Effect of Pt loading and calcination temperature on the photocatalytic hydrogen production activity of TiO<sub>2</sub> microspheres. *Ceramics International* **2013**, *39*, 5387-5391.
- [57] Fang, J.; Shi, F.; Bu, J.; Ding, J.; Xu, S.; Bao, J.; Ma, Y.; Jiang, Z.; Zhang, W.; Gao, C.; Huang, W. One-Step Synthesis of Bifunctional TiO<sub>2</sub> Catalysts and Their Photocatalytic Activity. *The Journal of Physical Chemistry C* **2010**, *114*, 7940-7948.
- [58] Maeda, K. Photocatalytic properties of rutile TiO<sub>2</sub> powder for overall water splitting. *Catalysis Science & Technology* **2014**, *4*, 1949-1953.
